# Supplementary material for: Transcriptome of Tumor-Infiltrating T Cells in Colorectal Cancer Patients Uncovered a Unique Gene Signature in CD4+ T Cells Associated with Poor Disease-Specific Survival
Source: MDPI journal article supplement (doi:10.3390/vaccines9040334), 2021-04-01
Supplement: s1 [file s1]

# Transcriptome of tumor-infiltrating T cells in colorectal cancer patients uncovered a unique gene signature in CD4<sup>+</sup> T cells associated with poor disease-specific survival

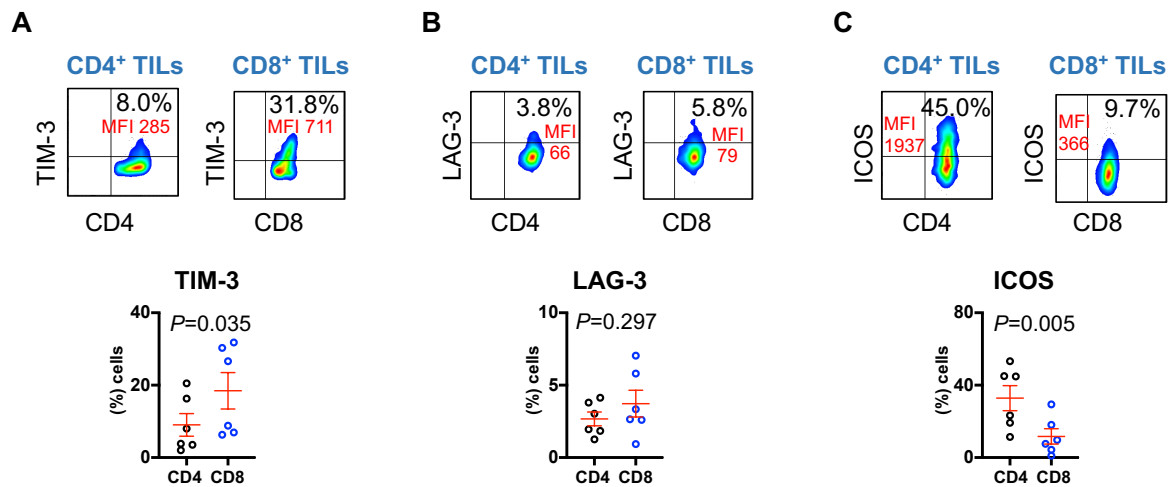

**Figure S1. Expression levels of selected dysregulated genes on CD4<sup>+</sup> and CD8<sup>+</sup> TILs.** We validated protein expression of selective immune checkpoint genes; HAVCR2 (gene for TIM-3), ICOS and LAG-3 in 6 CRC patients out of our patient cohort. Representative flow cytometric plots show the percentage and mean fluorescent intensity (MFI), and scatter plots show differences in percentage of TIM-3 (A), ICOS (B) and LAG-3 (C) expressing CD4<sup>+</sup> and CD8<sup>+</sup> TILs from 6 CRC patients.
